# Supplementary material for: A Herpesviral induction of RAE-1 NKG2D ligand expression occurs through release of HDAC mediated repression
Source: eLife journal article supplement (doi:10.7554/elife.14749), 2016-11-22
Supplement: supp [file elife-14749-supp-v1.zip]

**A**

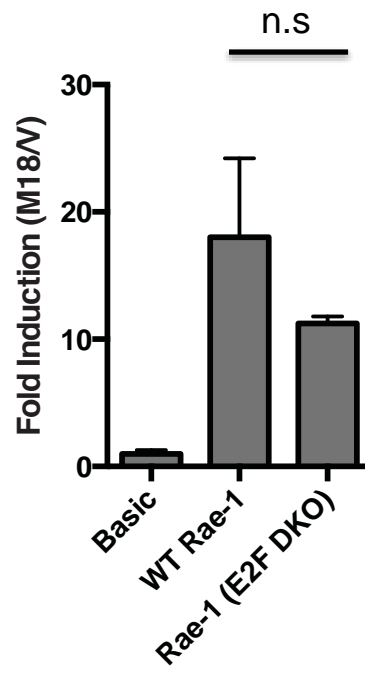

**Figure 3-Figure Supplement 1: m18 induces transcription from the *Rae1ε* promoter independent of E2F binding sites.**
