# Supplementary material for: A Herpesviral induction of RAE-1 NKG2D ligand expression occurs through release of HDAC mediated repression
Source: eLife journal article supplement (doi:10.7554/elife.14749), 2016-11-22
Supplement: supp [file elife-14749-supp-v1.zip]

Archive with 10 entries (10 files):
- elife_poa_e14749_Figure_2_figure_supplement_1.pdf
- elife_poa_e14749_Figure_3_figure_supplement_1.pdf
- elife_poa_e14749_Figure_6_figure_supplement_1.pdf
- elife_poa_e14749_Supplementary_File_3.xlsx
- elife_poa_e14749_Supplementary_File_4.xlsx
- elife_poa_e14749_Figure_3_figure_supplement_2.pdf
- elife_poa_e14749_Supplementary_File_2.xlsx
- elife_poa_e14749_Figure_7_figure_supplement_1.pdf
- elife_poa_e14749_Supplementary_File_1.xlsx
- elife_poa_e14749_Figure_5_figure_supplement1.pdf
