# Supplementary material for: A Herpesviral induction of RAE-1 NKG2D ligand expression occurs through release of HDAC mediated repression
Source: eLife journal article supplement (doi:10.7554/elife.14749), 2016-11-22
Supplement: supp [file elife-14749-supp-v1.zip › elife_poa_e14749_Figure_7_figure_supplement_1.pdf]

**A.**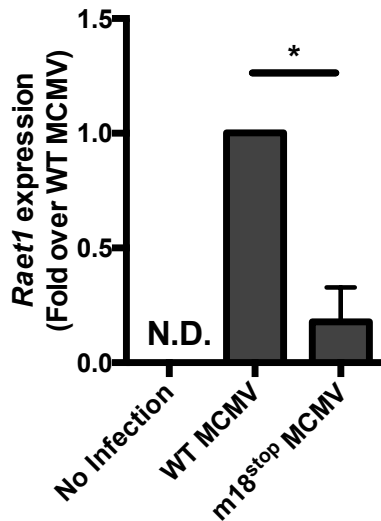**B.**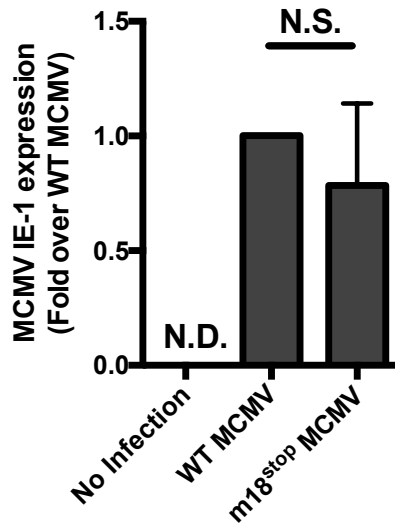

**Figure 7**-Figure Supplement 1: MCMVm18stop does not induce RAE-1 expression or cause a defect in IE-1 expression.
