# Supplementary material for: A Herpesviral induction of RAE-1 NKG2D ligand expression occurs through release of HDAC mediated repression
Source: eLife journal article supplement (doi:10.7554/elife.14749), 2016-11-22
Supplement: supp [file elife-14749-supp-v1.zip › elife_poa_e14749_Supplementary_File_1.xlsx]

## Sheet: Supplementary File 1
		M18-N-strep					M18 C-strep biol rep 1					M18 C-strep biol rep 2
Accession #	Gene Name	Num Unique	Peptide Count	% Cov	Best Disc Score	Best Expect Val	Num Unique	Peptide Count	% Cov	Best Disc Score	Best Expect Val	Num Unique	Peptide Count	% Cov	Best Disc Score	Best Expect Val	Protein MW	Species	Protein Name
Bait	BAIT	37	58	44.1	6.41	5.9e-10	36	56	43.3	4.77	4.4e-08	42	79	56.4	6.4	5.2e-10	108538	MOUSE CYTOMEGALOVIRUS	M18 synthetic construct
11024700	TIMM13	11	12	77.9	4.7	1.6e-06	6	7	77.9	3.51	1.5e-05	3	5	49.5	3.83	3e-05	10500.1	HOMO SAPIENS	mitochondrial import inner membrane translocase subunit Tim13
16933546	RPLP0	6	6	23.7	4.12	4.1e-07	8	9	28.7	4.31	3.9e-07	12	16	42	4.34	6.5e-08	34273.8	HOMO SAPIENS	60S acidic ribosomal protein P0
11415026	RPL18A	8	11	36.9	3.62	3.6e-06	12	19	58	4.71	9.7e-09	7	15	47.2	4.27	1.2e-07	20762.6	HOMO SAPIENS	60S ribosomal protein L18a
208973238	YWHAZ	10	14	46.9	4.29	6.7e-07	1	1	5.7	2.87	6.3e-06	6	9	27.3	3.89	6e-06	27745.3	HOMO SAPIENS	14-3-3 protein zeta/delta
14591909	RPL5	10	14	36.7	3.29	4.5e-06	9	12	32	4.52	3.4e-07	7	11	35	3.18	3.6e-06	34362.9	HOMO SAPIENS	60S ribosomal protein L5
4758152	TIMM8A	7	10	81.4	4.05	1.7e-07	6	9	76.3	3.59	8.3e-07	6	9	87.6	3.48	1.3e-06	10998.5	HOMO SAPIENS	mitochondrial import inner membrane translocase subunit Tim8 A isoform 1
100913206	DHX9	5	7	6	2.58	2.2e-05	9	11	9.9	3.3	1.4e-06	9	11	11.8	2.14	6.9e-05	140960	HOMO SAPIENS	ATP-dependent RNA helicase A
50659095	DDX21	4	4	9.1	2.49	4.2e-05	7	8	14.2	3.46	7.9e-07	3	4	6.8	2.66	2.5e-06	87345.1	HOMO SAPIENS	nucleolar RNA helicase 2
15011936	RPS26	4	4	44.3	3.7	5.9e-06	5	5	44.3	4.67	1.4e-06	5	7	44.3	2.66	1.1e-05	13015.5	HOMO SAPIENS	40S ribosomal protein S26
15431288	RPL10A	7	10	35.9	2.64	4.7e-05	7	12	35	3.37	4.1e-06	5	10	28.6	2.8	1.1e-05	24831.5	HOMO SAPIENS	60S ribosomal protein L10a
15431303	RPL9	6	9	56.8	1.76	0.00046	7	10	57.3	3.22	3.6e-06	8	13	62	2.74	1.5e-05	21863.6	HOMO SAPIENS	60S ribosomal protein L9
4506725	RPS4X	8	10	28.5	2.98	1e-05	9	11	39.9	2.98	4.9e-06	5	6	18.6	1.7	0.00047	29598	HOMO SAPIENS	40S ribosomal protein S4, X isoform X isoform
16117794	RPL36	4	5	36.2	1.95	0.00014	6	9	36.2	3.14	5.3e-06	4	5	34.3	1.87	0.00013	12253.8	HOMO SAPIENS	60S ribosomal protein L36
4506635	RPL32	2	3	17	4.58	3.8e-08	5	6	38.5	4.45	1.1e-07	4	6	28.9	4.55	1.5e-07	15859.9	HOMO SAPIENS	60S ribosomal protein L32
18104948	RPL21	1	2	9.4	4.04	1e-06	4	5	32.5	3.27	1.8e-05	5	7	30	4.19	3.2e-07	18565	HOMO SAPIENS	60S ribosomal protein L21
226530908	PCMT1	4	5	33	4.36	4.2e-07	3	4	23.9	3.27	1.5e-05						30315.2	HOMO SAPIENS	protein-L-isoaspartate(D-aspartate) O-methyltransferase isoform 1
4506631	RPL30	2	3	24.3	2.7	6.2e-05	5	7	60	3.01	3e-05	5	7	55.7	3.24	1.2e-06	12784.2	HOMO SAPIENS	60S ribosomal protein L30
4506613	RPL22	2	3	30.5	3.07	7.9e-06	4	7	39.8	3.12	9.2e-06	5	11	42.2	3.01	8.1e-06	14787.1	HOMO SAPIENS	60S ribosomal protein L22 proprotein
4506685	RPS13	3	4	23.2	2.29	0.00016	6	6	33.8	2.51	7e-05	1	2	8.6	1.4	0.00035	17222.4	HOMO SAPIENS	40S ribosomal protein S13
156523968	PARP1	2	2	3.2	1.7	0.00075	5	5	6	3.17	2.9e-06	3	4	5.6	3.64	3.2e-06	113085	HOMO SAPIENS	poly [ADP-ribose] polymerase 1
17105394	RPL23A	3	3	24.4	0.58	0.0058	6	8	28.2	2.39	0.00016	4	4	24.4	1.05	0.0012	17695.2	HOMO SAPIENS	60S ribosomal protein L23a
4503481	EEF1G	4	4	14.6	3.86	1.9e-06	2	3	8.5	2.02	4.7e-05						50119.2	HOMO SAPIENS	elongation factor 1-gamma
5174449	H1FX	3	3	17.8	2.71	2.4e-05	2	3	16	3.16	1.8e-06	4	4	26.8	3.88	1.9e-08	22487.3	HOMO SAPIENS	histone H1x
6857818	NPM3	2	3	25.8	3.33	2.4e-05	2	2	25.8	3.82	1.9e-05	4	6	46.1	3.02	0.0001	19343.9	HOMO SAPIENS	nucleoplasmin-3
212549553	ILF3	3	4	7.5	3.52	4.1e-06	4	7	7.5	3.51	3.4e-06	3	3	8	1.5	0.00055	95808.7	HOMO SAPIENS	interleukin enhancer-binding factor 3 isoform d
56237027	IGF2BP1	4	5	10.4	2.81	1.9e-06	5	7	13.3	2.32	0.00012	2	3	5	1.82	3.8e-05	63481.1	HOMO SAPIENS	insulin-like growth factor 2 mRNA-binding protein 1 isoform 1
38327039	HSPA4	5	5	11.7	2.58	2.8e-05	3	4	8.5	1.59	0.0011						94331.8	HOMO SAPIENS	heat shock 70 kDa protein 4
306482646	SRSF2	2	2	14.5	1.66	0.00057	3	4	22.2	3.82	7.1e-07						25476.5	HOMO SAPIENS	serine/arginine-rich splicing factor 2
6912634	RPL13A	6	7	27.1	1.86	0.00058	6	7	26.1	1.61	0.0018	6	9	25.6	2.15	9.4e-05	23577.4	HOMO SAPIENS	60S ribosomal protein L13a
11225260	TOP1	3	3	3.9	1.38	0.0002	4	4	7.8	2.9	5e-06	3	5	5	1.81	0.00024	90726.5	HOMO SAPIENS	DNA topoisomerase 1
313569768	RPL17	7	9	47.3	1.78	0.00026	5	9	41.8	2.25	3.4e-05	4	6	16.3	0.72	0.0047	21397.2	HOMO SAPIENS	60S ribosomal protein L17 isoform a
4507231	SSBP1	4	5	29.1	2.6	1.5e-05	2	3	20.3	1.84	0.00012						17259.8	HOMO SAPIENS	single-stranded DNA-binding protein, mitochondrial precursor
149999611	SRP14	2	3	21.3	3.34	1.3e-05	2	3	21.3	2.3	9.2e-05	3	3	21.3	3.66	4.6e-06	14570.1	HOMO SAPIENS	signal recognition particle 14 kDa protein
256773260	TIMM8B	3	3	22.4	3.02	1.1e-05	1	1	22.4	1.98	0.00022						11154.9	HOMO SAPIENS	mitochondrial import inner membrane translocase subunit Tim8 B
4506701	RPS23	2	2	28	1.88	8.6e-05	2	3	8.4	1.3	0.00019	4	4	35.7	2.98	3e-06	15807.7	HOMO SAPIENS	40S ribosomal protein S23
13904870	RPS5	2	3	15.2	3.07	2e-05	3	4	22.5	3.01	1.1e-05	2	3	11.8	2.43	3.3e-05	22876.6	HOMO SAPIENS	40S ribosomal protein S5
15431293	RPL15	5	7	27.9	2.07	2.8e-05	4	5	21.1	2.05	2.3e-05	7	8	28.4	1.37	0.0024	24146.3	HOMO SAPIENS	60S ribosomal protein L15 isoform 1
23503295	CSNK2B	1	2	5.1	2.9	2.1e-06	1	1	5.1	2.73	7.3e-06	2	3	8.8	3.97	2.3e-07	24942.7	HOMO SAPIENS	casein kinase II subunit beta
4502491	C1QBP	2	3	14.9	4.19	4.3e-07	1	1	9.6	3.06	1.2e-05	1	2	9.6	3.78	3.8e-07	31362.5	HOMO SAPIENS	complement component 1 Q subcomponent-binding protein, mitochondrial precursor
34740329	HNRNPA3	1	1	5.8	3.05	4e-07	2	4	9.3	4.01	9.2e-09	1	1	5.8	3.8	4.4e-08	39595.3	HOMO SAPIENS	heterogeneous nuclear ribonucleoprotein A3
4758138	DDX5	1	1	2.3	0.33	0.0063	3	4	5.7	2.41	2.7e-05	3	4	11.2	1.64	3.6e-05	69148.7	HOMO SAPIENS	probable ATP-dependent RNA helicase DDX5
14916501	RPS24	1	1	9.2	1.29	0.00034	2	2	20.8	3.73	3.1e-07	2	2	11.5	2.77	4e-06	15068.9	HOMO SAPIENS	40S ribosomal protein S24 isoform a
6005860	RPL35	3	3	22	1.86	0.00021	4	6	29.3	1.88	0.00011	2	3	22	2.58	3.8e-06	14551.6	HOMO SAPIENS	60S ribosomal protein L35
5803036	HNRNPA0						2	3	16.4	3.52	3.7e-05						30840.9	HOMO SAPIENS	heterogeneous nuclear ribonucleoprotein A0
4506623	RPL27	3	3	28.7	0.67	0.0041	4	4	36.8	2.46	9e-06	3	3	29.4	1.64	0.00023	15797.9	HOMO SAPIENS	60S ribosomal protein L27
118582269	SRSF1	1	1	8.5	1.11	0.00077	4	5	30.3	1.66	0.00041	1	1	8.5	1.4	4e-05	22460.1	HOMO SAPIENS	serine/arginine-rich splicing factor 1 isoform 2
14165469	RPS15A	1	1	6.9	0.71	0.004	3	4	28.5	2.63	1.2e-05	2	2	24.6	1.18	0.0034	14839.6	HOMO SAPIENS	40S ribosomal protein S15a
106775678	HIST2H2AA3	2	4	23.1	2.65	6.6e-06	2	4	23.1	3.77	1.5e-07	2	4	21.5	3.57	1.4e-07	14095.6	HOMO SAPIENS	histone H2A type 2-A
4503841	XRCC6	3	3	8.4	2.21	9.9e-05	2	2	4.1	2.25	0.00011						69843.7	HOMO SAPIENS	X-ray repair cross-complementing protein 6
237820620	GRWD1	1	2	3.6	3.71	9.5e-07	2	3	8.3	3.01	1.3e-05						49419.6	HOMO SAPIENS	glutamate-rich WD repeat-containing protein 1
7657381	PRPF19	2	3	10.1	2.07	0.00013	2	3	8.7	1.95	0.00023	3	4	12.9	2.35	5.3e-05	55181.3	HOMO SAPIENS	pre-mRNA-processing factor 19
16117787	RPL34						1	2	10.3	3.01	1.9e-05	2	2	10.3	3.22	3.1e-05	13293.1	HOMO SAPIENS	60S ribosomal protein L34
14141193	RPS9	4	4	14.4	1.6	0.0016	4	4	15.5	1.61	0.00011	3	3	17	1.85	0.00056	22591.6	HOMO SAPIENS	40S ribosomal protein S9
14110414	HNRNPD						3	3	13.7	2.64	5.4e-06	1	2	5.6	1.34	0.00065	32834.8	HOMO SAPIENS	heterogeneous nuclear ribonucleoprotein D0 isoform c
4506715	RPS28	1	1	29	0.66	0.0025	3	3	46.4	1.98	3.6e-05	1	2	29	3.06	2.1e-06	7841.1	HOMO SAPIENS	40S ribosomal protein S28
156151392	HNRNPR	1	1	2.3	1.68	0.00014	2	2	4.7	2.6	4.9e-05	1	1	2.3	1.53	0.00011	59682	HOMO SAPIENS	heterogeneous nuclear ribonucleoprotein R isoform 4
208022622	RPS27A	1	3	8.3	2.08	8.6e-05	2	5	20.5	2.63	1.6e-05						17965.1	HOMO SAPIENS	ubiquitin-40S ribosomal protein S27a precursor
4503507	EIF2S3	1	2	5.3	1.33	0.00029	2	3	8.9	2.4	5.7e-05						51109.9	HOMO SAPIENS	eukaryotic translation initiation factor 2 subunit 3
4506707	RPS25	1	1	7.2	1.44	0.00091	2	2	16	2.15	0.00011	2	2	20	1.62	0.00047	13742.2	HOMO SAPIENS	40S ribosomal protein S25
5453603	CCT2						2	3	5.2	2.49	1.4e-05						57488.7	HOMO SAPIENS	T-complex protein 1 subunit beta isoform 1
164664518	DDX6	3	3	13	1.62	9.3e-05	2	2	9.9	0.71	0.0021						54417.3	HOMO SAPIENS	probable ATP-dependent RNA helicase DDX6
32189394	ATP5B	1	1	3.6	2.76	5e-06	2	3	6	2.54	1.6e-05						56560.4	HOMO SAPIENS	ATP synthase subunit beta, mitochondrial precursor
148746199	RPL31						1	2	18	0.76	0.002	3	3	23.4	1.49	0.0022	14632.3	HOMO SAPIENS	60S ribosomal protein L31 isoform 2
4506621	RPL26	3	4	22.1	1.82	9.2e-05	5	6	28.3	1.05	0.0015	1	2	7.6	1.43	0.00029	17258.4	HOMO SAPIENS	60S ribosomal protein L26
4507217	SRP9L1	1	1	22.1	0.61	0.0065	2	3	36	2	9.4e-05						10111.8	HOMO SAPIENS	signal recognition particle 9 kDa protein isoform 2
316983124	RPL36A	1	1	6.3	0.54	0.0035	1	1	6.3	0.49	0.006	2	3	9.2	1.99	2.5e-05	16378.3	HOMO SAPIENS	60S ribosomal protein L36a isoform a
153792590	HSP90A	2	2	2.7	1.9	0.00048	1	2	1.6	2.57	0.00011						98162	HOMO SAPIENS	heat shock protein HSP 90-alpha isoform 1
4506643	RPL37A	1	1	13	0.8	0.0025						2	3	32.6	2.11	2.6e-05	10275.4	HOMO SAPIENS	60S ribosomal protein L37a
10863945	XRCC5	2	3	3.4	1.63	0.0011	3	3	4.6	1.6	0.00011						82705.3	HOMO SAPIENS	X-ray repair cross-complementing protein 5
321117084	RPS10-NUDT3	1	1	3.1	1.56	0.0009						2	3	5.5	1.71	8.6e-05	33141.2	HOMO SAPIENS	RPS10-NUDT3 protein
55956919	HNRNPAB						2	2	6.3	1.85	6.5e-05						35967.8	HOMO SAPIENS	heterogeneous nuclear ribonucleoprotein A/B isoform a
10800138	HIST1H2BD	1	2	11.9	2.57	1.7e-05	2	2	20.6	0.41	0.0021	2	2	19	0.99	0.00059	13936.3	HOMO SAPIENS	histone H2B type 1-D
4503659	FAU	1	1	7.5	0.5	0.0017	1	1	7.5	0.78	0.00054	2	2	8.3	1.35	0.00038	14389.8	HOMO SAPIENS	ubiquitin-like protein fubi and ribosomal protein S30 precursor
20127499	SRSF6	2	2	5.2	1.22	0.0015	2	2	5.2	1.01	0.002	2	2	5.8	1.19	0.00062	39587.1	HOMO SAPIENS	serine/arginine-rich splicing factor 6
238776833	ALYREF	2	2	16.7	1.43	8.2e-05	1	2	6.8	2.13	5.6e-05	1	1	6.8	1.72	2.6e-05	27557.9	HOMO SAPIENS	THO complex subunit 4
12751497	C8orf33						2	2	17.5	0.84	0.0024	1	2	10.5	1.58	0.0015	24992.7	HOMO SAPIENS	UPF0488 protein C8orf33
5031741	DNAJA2	2	2	11.4	0.85	0.0075											45746	HOMO SAPIENS	dnaJ homolog subfamily A member 2
17986258	MYL6						2	3	19.2	0.8	0.0044						16930.2	HOMO SAPIENS	myosin light polypeptide 6 isoform 1
