# Supplementary material for: A Herpesviral induction of RAE-1 NKG2D ligand expression occurs through release of HDAC mediated repression
Source: eLife journal article supplement (doi:10.7554/elife.14749), 2016-11-22
Supplement: supp [file elife-14749-supp-v1.zip › elife_poa_e14749_Supplementary_File_2.xlsx]

## Sheet: Supplementary File 2
		M18-N-strep					M18 C-strep biol rep 1					M18 C-strep biol rep 2
Accession #	Gene Name	Num Unique	Peptide Count	% Cov	Best Disc Score	Best Expect Val	Num Unique	Peptide Count	% Cov	Best Disc Score	Best Expect Val	Num Unique	Peptide Count	% Cov	Best Disc Score	Best Expect Val	Protein MW	Species	Protein Name
31542947	HSPD1	36	57	56.2	6.92	4.4e-10	21	28	53.2	5.55	1.3e-08	21	27	57.8	7.67	6.4e-11	61055.2	HOMO SAPIENS	60 kDa heat shock protein, mitochondrial
14141152	HNRNPM	23	35	33.8	4.87	2e-08	32	40	45.3	4.63	9.3e-09	27	39	41.8	4.94	3.6e-09	77516.4	HOMO SAPIENS	heterogeneous nuclear ribonucleoprotein M isoform a
55956788	NCL	21	33	23.7	4.17	3.3e-07	24	33	34.4	4.32	1.3e-07	13	23	23.5	5.02	7.3e-08	76615	HOMO SAPIENS	nucleolin
167466173	HSPA1B	18	25	38.8	4.73	1.8e-07	11	15	23.1	4.64	2.3e-07	11	17	23.6	4.58	1.1e-07	70052.8	HOMO SAPIENS	heat shock 70 kDa protein 1A/1B
16579885	RPL4	17	23	39.6	4.54	1.5e-07	19	26	43.3	4.17	5.1e-07	19	29	40.3	4.43	1.7e-07	47697.7	HOMO SAPIENS	60S ribosomal protein L4
5174735	TUBB4B	15	21	51.2	4.19	1.5e-06	11	13	42.2	4.09	2.3e-06	10	14	33.7	4.39	6.5e-07	49831.5	HOMO SAPIENS	tubulin beta-4B chain
4506649	RPL3	6	10	25.1	3.78	1.4e-06	13	18	33	4.69	2.4e-08	11	19	33.3	4.77	2e-08	46109.3	HOMO SAPIENS	60S ribosomal protein L3 isoform a
10835063	NPM1	12	17	41.5	3.45	3.4e-06	17	26	43.9	3.31	1.1e-06	14	17	46.3	4.12	2e-08	32575.3	HOMO SAPIENS	nucleophosmin isoform 1
4506723	RPS3A	8	10	33	3.15	1.6e-05	10	13	36.4	4.57	6.6e-07	10	12	31.4	4.74	9e-08	29945.2	HOMO SAPIENS	40S ribosomal protein S3a
119943100	PCCB	11	13	30.6	4.04	8.2e-07	11	12	28.8	3.52	1.4e-05	4	4	11.1	1.96	0.00023	58216.2	HOMO SAPIENS	propionyl-CoA carboxylase beta chain, mitochondrial isoform 1
14141161	HNRNPU	9	10	16.1	2.57	2.7e-05	13	16	21.6	3.31	2.8e-05	7	11	11.5	3.62	1.6e-05	88980.4	HOMO SAPIENS	heterogeneous nuclear ribonucleoprotein U isoform b
4506743	RPS8	9	12	47.6	4.23	1.3e-06	11	16	49	4.28	7.5e-07	8	12	46.6	4.3	6.4e-07	24205.4	HOMO SAPIENS	40S ribosomal protein S8
16753227	RPL6	9	11	29.2	5.15	7.7e-08	9	14	30.6	4.62	2.4e-07	10	15	34.4	4.53	5.9e-08	32728.2	HOMO SAPIENS	60S ribosomal protein L6
15431301	RPL7	8	11	39.9	2.62	0.00016	11	15	51.2	3.4	5e-05	8	13	42.7	3.22	1.4e-05	29226	HOMO SAPIENS	60S ribosomal protein L7
14277700	RPS12	5	7	55.3	6.89	1.7e-08	5	7	55.3	6.84	3.1e-08	2	2	25	5.9	2.2e-08	14515.1	HOMO SAPIENS	40S ribosomal protein S12
78000181	RPL14	4	4	20.9	4.04	1.9e-06	3	5	14	3.82	3.1e-06	10	16	33.5	3.37	4.5e-06	23432.1	HOMO SAPIENS	60S ribosomal protein L14
17986283	TUBA1A	12	17	45.7	3.09	2.6e-06	7	8	25.9	2.35	4.1e-05	5	5	19.5	2.56	6.2e-05	50136.1	HOMO SAPIENS	tubulin alpha-1A chain
15055539	RPS2	4	5	17.4	2.1	0.00018	6	8	19.8	3.01	1.1e-05	9	12	31.1	3.55	1.1e-05	31324.7	HOMO SAPIENS	40S ribosomal protein S2
4506671	RPLP2	7	11	86.1	3.3	2.3e-06	7	11	93	4.97	2.5e-08	4	7	31.3	3.71	4.6e-06	11665	HOMO SAPIENS	60S acidic ribosomal protein P2
189095269	PCCA	9	16	21.7	3.5	1.6e-06	11	15	24.1	3.23	1.6e-06	5	6	13.4	3.1	4.9e-06	77048.2	HOMO SAPIENS	propionyl-CoA carboxylase alpha chain, mitochondrial isoform b
11545863	MCCC2	7	8	16.9	4.07	2.8e-06	7	8	15.6	4.04	9.5e-07						61333.7	HOMO SAPIENS	methylcrotonoyl-CoA carboxylase beta chain, mitochondrial
4885375	Hist1h1c	8	11	31.5	4.09	6.4e-07	6	9	31.5	2.18	7.9e-05	7	9	39	3.01	1e-05	21364.9	HOMO SAPIENS	histone H1.2
14043072	HNRNPA2B1	5	8	24.1	2.83	7.6e-07	8	12	38.5	5.15	2e-10	2	4	9.9	1.18	0.00025	37430	HOMO SAPIENS	heterogeneous nuclear ribonucleoproteins A2/B1 isoform B1
119395750	KRT1	8	11	15.1	3.21	0.00013	2	2	3.7	3.19	0.00015						66039.2	HOMO SAPIENS	keratin, type II cytoskeletal 1
15431306	RPL8	5	7	17.1	3.51	4.4e-06	9	16	42.8	3.08	4.4e-05	9	17	42.8	3.3	2.2e-06	28024.9	HOMO SAPIENS	60S ribosomal protein L8
4506619	RPL24	6	7	29.3	2.77	1.3e-05	7	10	29.9	4	3.7e-06	5	8	23.6	4.17	7.8e-07	17779.1	HOMO SAPIENS	60S ribosomal protein L24
17158044	RPS6	6	8	28.1	2.2	9.8e-05	9	11	38.2	3.13	1.1e-05	6	8	26.1	3.47	1.1e-06	28680.9	HOMO SAPIENS	40S ribosomal protein S6
14043070	HNRNPA1	5	9	25	4.28	5.4e-08	8	13	30.9	4.03	5.5e-08	4	7	18.8	3.95	6.1e-08	38746.9	HOMO SAPIENS	heterogeneous nuclear ribonucleoprotein A1 isoform b
223890243	RPL10	5	8	30.8	2.82	1.8e-05	4	6	25.2	2.97	4.6e-06	8	13	45.8	3.41	1.3e-06	24604.1	HOMO SAPIENS	60S ribosomal protein L10
4506597	RPL12	4	6	41.8	3.92	2e-06	6	7	47.3	3.79	1.8e-06	5	10	35.2	4.43	4.8e-07	17818.7	HOMO SAPIENS	60S ribosomal protein L12
4506661	RPL7A	7	8	36.1	2.94	1.3e-05	5	5	19.2	3.7	5.6e-07	11	14	46.6	2.39	4.1e-05	29995.9	HOMO SAPIENS	60S ribosomal protein L7a
27262647	ATXN2L	10	11	14.4	2.5	2.5e-05	6	6	10.9	2.44	1.2e-05						113374	HOMO SAPIENS	ataxin-2-like protein isoform A
24234688	HSPA9	9	12	19.7	3.02	2.1e-06	6	9	15.3	2.23	3.3e-05	3	5	7.8	1.31	0.00015	73681.1	HOMO SAPIENS	stress-70 protein, mitochondrial precursor
11968182	RPS18	9	9	48	1.12	0.0011	9	9	48	2.04	0.00027	6	9	35.5	2.13	0.00028	17718.8	HOMO SAPIENS	40S ribosomal protein S18
15431295	RPL13	4	4	15.2	1.55	0.0045	5	6	26.1	2.23	0.00016	6	7	29.9	3.31	1.5e-05	24261.7	HOMO SAPIENS	60S ribosomal protein L13 isoform 1
4506609	RPL19	3	3	13.8	3.24	1.4e-05	5	7	22.4	4.11	1.9e-06	3	3	17.3	4.13	1.2e-06	23466.2	HOMO SAPIENS	60S ribosomal protein L19
34098946	YBX1	3	4	24.4	4.6	3.9e-06	3	5	29.3	5.21	4.3e-06						35924.5	HOMO SAPIENS	nuclease-sensitive element-binding protein 1
4506741	RPS7	3	7	25.8	3.74	2.4e-06	6	10	45.4	2.99	7.2e-06	4	8	35.6	4.19	1.3e-06	22127	HOMO SAPIENS	40S ribosomal protein S7
4506625	RPL27A	4	5	32.4	2.43	3.9e-05	5	8	32.4	3.17	4.9e-06	5	9	38.5	3.34	1.9e-05	16561.5	HOMO SAPIENS	60S ribosomal protein L27a
156071459	SLC25A5	6	7	19.8	2.68	3.8e-05	2	2	7.7	2.89	1.4e-05	1	3	7.7	5.5	8.9e-09	32852.5	HOMO SAPIENS	ADP/ATP translocase 2
15718687	RPS3	5	7	34.2	2.66	4.4e-05	6	7	38.3	3.03	9.2e-06	4	7	27.6	3.11	1e-05	26688.6	HOMO SAPIENS	40S ribosomal protein S3
5032051	RPS14	5	6	33.1	3.29	2.1e-06	6	7	41.1	2.83	1e-05	6	12	41.1	2.64	2.9e-05	16272.9	HOMO SAPIENS	40S ribosomal protein S14
4506605	RPL23	1	2	14.3	2.9	4.1e-06	5	7	40	3.69	3.4e-07	4	6	34.3	3.96	3.2e-07	14865.6	HOMO SAPIENS	60S ribosomal protein L23
13904866	RPL28	3	5	30.7	1.41	0.00092	5	7	29.2	3.66	5.3e-07	5	9	37.2	3.74	5.3e-07	15747.6	HOMO SAPIENS	60S ribosomal protein L28 isoform 2
4506695	RPS19	4	8	25.5	2.59	1.3e-05	5	7	31	2.6	6.6e-06	6	8	41.4	3	2.7e-06	16060.6	HOMO SAPIENS	40S ribosomal protein S19
4506681	RPS11	3	4	25.3	1.67	0.00026	4	5	31.6	2.56	1.3e-05	7	8	43	2.82	9.2e-06	18430.9	HOMO SAPIENS	40S ribosomal protein S11
312284072	RPS17L	1	3	16.3	3.13	2.6e-06	3	7	32.6	4.25	4.4e-08	5	8	55.6	3.86	2.2e-07	15550.3	HOMO SAPIENS	40S ribosomal protein S17-like
134951	STRAV	3	4	27.3	2.43	4.5e-05	2	2	15.8	1.98	9.7e-05	3	4	26.2	4.42	4e-08	18833.9	STRAV	RecName: Full=Streptavidin; Flags: Precursor
18105007	CAD	5	6	5.4	2.57	0.00013											242986	HOMO SAPIENS	CAD protein
136429	trypsin	3	4	16.5	3.38	1.2e-05	3	4	19.9	4.34	2.6e-07						24409.7	PIG	RecName: Full=Trypsin; Flags: Precursor
315221152	RPL11	1	3	7.9	1.69	0.00082	5	5	28.2	3.4	4.4e-07	2	3	15.8	1.86	7.6e-05	20124.4	HOMO SAPIENS	60S ribosomal protein L11 isoform 2
4506629	RPL29	3	3	15.1	3.36	1e-06	2	2	10.1	4.01	7.3e-08	3	5	12.6	4.14	1.6e-07	17752.2	HOMO SAPIENS	60S ribosomal protein L29
4506691	RPS16	3	4	24.7	2.02	3e-05	6	8	39.7	1.83	5.6e-05	5	8	29.5	3.14	4.3e-07	16445.5	HOMO SAPIENS	40S ribosomal protein S16
55956899	KRT9	6	7	11.9	2.71	4.3e-07	1	1	1.4	0.31	0.0081						62064.8	HOMO SAPIENS	keratin, type I cytoskeletal 9
116805327	MCCC1	4	5	8.4	2.84	6.7e-06	4	5	8.4	2.51	1.2e-05						80473.8	HOMO SAPIENS	methylcrotonoyl-CoA carboxylase subunit alpha, mitochondrial precursor
5031753	HNRNPH1	2	2	7.6	2.8	2e-05	3	4	11.1	2.84	2.3e-05						49229.9	HOMO SAPIENS	heterogeneous nuclear ribonucleoprotein H
4506607	RPL18	2	4	16	3.51	8.2e-06	4	5	22.3	2.24	2.3e-05	4	8	25	2.02	0.00018	21634.7	HOMO SAPIENS	60S ribosomal protein L18
46367787	PABPC1	3	3	6.9	1.87	0.00014	3	3	6.3	2.05	3.7e-05						70671.5	HOMO SAPIENS	polyadenylate-binding protein 1
4503471	EEF1A1	2	3	7.6	2.15	0.00011	3	5	9.7	1.66	0.00027						50141.3	HOMO SAPIENS	elongation factor 1-alpha 1
4757810	ATP5A1	2	2	6.1	2	0.00012	2	2	6.1	2.4	1.7e-05						59751.1	HOMO SAPIENS	ATP synthase subunit alpha, mitochondrial precursor
4505775	SLC25A3	2	2	10.8	1	0.0012	1	1	3.3	1.05	0.003	1	1	7.5	1.44	0.00026	39959.1	HOMO SAPIENS	phosphate carrier protein, mitochondrial isoform b precursor
