# Supplementary material for: A Herpesviral induction of RAE-1 NKG2D ligand expression occurs through release of HDAC mediated repression
Source: eLife journal article supplement (doi:10.7554/elife.14749), 2016-11-22
Supplement: supp [file elife-14749-supp-v1.zip › elife_poa_e14749_Supplementary_File_3.xlsx]

## Sheet: Supplementary File 3
Accession#	Gene name	Description	Organism	Z-score	Replicate Z-scores	Replicate count sum	Replicate counts	Background counts	Background avg count
200000070	BAIT	M18 synthetic construct	MOUSE CYTOMEGALOVIRUS	24.454	24.454 | 24.454 | 24.454	193	58 | 56 | 79	0	0
23503295	CSNK2B	casein kinase II subunit beta	Homo sapiens	24.454	24.454 | 24.454 | 24.454	6	2 | 1 | 3	0	0
15431303	RPL9	60S ribosomal protein L9	Homo sapiens	17.667	16.34 | 17.279 | 19.382	32	9 | 10 | 13	35	0.059
4506671	RPLP2	60S acidic ribosomal protein P2	Homo sapiens	16.77	18.14 | 18.14 | 14.031	29	11 | 11 | 7	54	0.09
11225260	TOP1	DNA topoisomerase 1	Homo sapiens	16.508	14.102 | 16.772 | 18.65	12	3 | 4 | 5	10	0.017
49574537	GCSH	glycine cleavage system H protein, mitochondrial precursor	Homo sapiens	16.303	24.454 | 24.454 | 0	3	2 | 1 | 0	0	0
237649012	EBNA1BP2	probable rRNA-processing protein EBP2 isoform 1	Homo sapiens	16.303	0 | 24.454 | 24.454	2	0 | 1 | 1	0	0
6857818	NPM3	nucleoplasmin-3	Homo sapiens	15.84	15.278 | 11.495 | 20.748	11	3 | 2 | 6	6	0.01
11415026	RPL18A	60S ribosomal protein L18a	Homo sapiens	14.999	12.323 | 17.412 | 15.262	45	11 | 19 | 15	96	0.161
16117794	RPL36	60S ribosomal protein L36	Homo sapiens	13.485	11.661 | 17.134 | 11.661	19	5 | 9 | 5	37	0.062
6912634	RPL13A	60S ribosomal protein L13a	Homo sapiens	13.273	12.48 | 12.48 | 14.86	23	7 | 7 | 9	52	0.087
55770900	BRIX1	ribosome biogenesis protein BRX1 homolog	Homo sapiens	13.035	-0.041 | 17.277 | 21.869	3	0 | 1 | 2	1	0.002
4506715	RPS28	40S ribosomal protein S28	Homo sapiens	12.846	7.675 | 17.306 | 13.557	6	1 | 3 | 2	9	0.015
237820620	GRWD1	glutamate-rich WD repeat-containing protein 1	Homo sapiens	12.525	17.277 | 20.34 | -0.041	5	2 | 3 | 0	2	0.003
11024700	TIMM13	mitochondrial import inner membrane translocase subunit Tim13	Homo sapiens	12.463	16.772 | 11.742 | 8.873	24	12 | 7 | 5	43	0.072
15431288	RPL10A	60S ribosomal protein L10a	Homo sapiens	12.261	11.691 | 13.403 | 11.691	32	10 | 12 | 10	114	0.191
55956788	NCL	nucleolin	Homo sapiens	11.985	13.078 | 13.078 | 9.799	89	33 | 33 | 23	381	0.637
14141152	HNRNPM	heterogeneous nuclear ribonucleoprotein M isoform a	Homo sapiens	11.754	11.005 | 12.248 | 12.009	114	35 | 40 | 39	769	1.286
10835063	NPM1	nucleophosmin isoform 1	Homo sapiens	11.184	9.879 | 13.794 | 9.879	60	17 | 26 | 17	324	0.542
4507231	SSBP1	single-stranded DNA-binding protein, mitochondrial precursor	Homo sapiens	11.049	18.878 | 14.378 | -0.11	8	5 | 3 | 0	11	0.018
7657381	PRPF19	pre-mRNA-processing factor 19	Homo sapiens	10.994	10.134 | 10.134 | 12.713	10	3 | 3 | 4	17	0.028
14043070	HNRNPA1	heterogeneous nuclear ribonucleoprotein A1 isoform b	Homo sapiens	10.58	10.128 | 13.513 | 8.1	29	9 | 13 | 7	148	0.247
264681556	WDR26	WD repeat-containing protein 26 isoform b	Homo sapiens	10.201	-0.071 | 12.196 | 18.479	3	0 | 1 | 2	3	0.005
14591909	RPL5	60S ribosomal protein L5	Homo sapiens	10.06	11.187 | 9.851 | 9.141	37	14 | 12 | 11	89	0.149
149999611	SRP14	signal recognition particle 14 kDa protein	Homo sapiens	9.857	9.857 | 9.857 | 9.857	9	3 | 3 | 3	22	0.037
4506613	RPL22	60S ribosomal protein L22 proprotein	Homo sapiens	9.834	4.702 | 10.318 | 14.481	21	3 | 7 | 11	55	0.092
4506649	RPL3	60S ribosomal protein L3 isoform a	Homo sapiens	9.743	6.521 | 11.107 | 11.602	47	10 | 18 | 19	303	0.507
16579885	RPL4	60S ribosomal protein L4	Homo sapiens	9.51	8.533 | 9.528 | 10.471	78	23 | 26 | 29	590	0.987
4758152	TIMM8A	mitochondrial import inner membrane translocase subunit Tim8 A isoform 1	Homo sapiens	9.464	10.042 | 9.176 | 9.176	28	10 | 9 | 9	71	0.119
15431293	RPL15	60S ribosomal protein L15 isoform 1	Homo sapiens	9.348	9.819 | 7.246 | 10.979	20	7 | 5 | 8	94	0.157
313569768	RPL17	60S ribosomal protein L17 isoform a	Homo sapiens	9.092	10.118 | 10.118 | 7.04	24	9 | 9 | 6	83	0.139
17105394	RPL23A	60S ribosomal protein L23a	Homo sapiens	8.933	5.758 | 13.467 | 7.575	15	3 | 8 | 4	59	0.099
15011936	RPS26	40S ribosomal protein S26	Homo sapiens	8.914	6.925 | 8.503 | 11.316	16	4 | 5 | 7	56	0.094
16933546	RPLP0	60S acidic ribosomal protein P0	Homo sapiens	8.855	5.481 | 8.07 | 13.015	31	6 | 9 | 16	138	0.231
15431306	RPL8	60S ribosomal protein L8	Homo sapiens	8.847	4.862 | 10.569 | 11.11	40	7 | 16 | 17	235	0.393
106775678	HIST2H2AA4	histone H2A type 2-A	Homo sapiens	8.807	8.807 | 8.807 | 8.807	12	4 | 4 | 4	26	0.043
16753227	RPL6	60S ribosomal protein L6	Homo sapiens	8.752	7.353 | 9.167 | 9.736	40	11 | 14 | 15	227	0.38
4506625	RPL27A	60S ribosomal protein L27a	Homo sapiens	8.717	6.141 | 9.503 | 10.508	22	5 | 8 | 9	122	0.204
12751497	C8orf33	UPF0488 protein C8orf33	Homo sapiens	8.671	-0.078 | 13.045 | 13.045	4	0 | 2 | 2	6	0.01
15431301	RPL7	60S ribosomal protein L7	Homo sapiens	8.579	7.371 | 9.762 | 8.602	39	11 | 15 | 13	237	0.396
4506623	RPL27	60S ribosomal protein L27	Homo sapiens	8.291	7.555 | 9.763 | 7.555	10	3 | 4 | 3	38	0.064
4507217	SRP9	signal recognition particle 9 kDa protein isoform 2	Homo sapiens	8.291	7.677 | 17.29 | -0.096	4	1 | 3 | 0	7	0.012
212549553	ILF3	interleukin enhancer-binding factor 3 isoform d	Homo sapiens	8.277	7.354 | 11.877 | 5.599	14	4 | 7 | 3	38	0.064
