# Supplementary material for: A Herpesviral induction of RAE-1 NKG2D ligand expression occurs through release of HDAC mediated repression
Source: eLife journal article supplement (doi:10.7554/elife.14749), 2016-11-22
Supplement: supp [file elife-14749-supp-v1.zip › elife_poa_e14749_Supplementary_File_4.xlsx]

## Sheet: Supplementary File 4
		M18 N-strep										M18 C-strep
Peptide Mapping	M18 canonical numbering, start residue #	m/z	z	error (ppm)	Peptide	Protein Mods	Missed Cleavages	Fraction	Retention Time	Score	Expect	m/z	z	error (ppm)	Peptide	Protein Mods	Missed Cleavages	Fraction	Retention Time	Score	Expect
canonical M18	15	974.17	3	13	VVRAPVVPVDMPSDGSAAAEPVGGNNSTAR		1	F20120413-02_ITMSms2cid	31.668	35	8.2e-08	974.16	3	2.5	VVRAPVVPVDMPSDGSAAAEPVGGNNSTAR		1	F20120607-18_ITMSms2cid	32.097	39.7	6.7e-09
canonical M18	15	979.492	3	2.4	VVRAPVVPVDM(Oxidation)PSDGSAAAEPVGGNNSTAR	Oxidation@25	1	F20120413-02_ITMSms2cid	28.148	25.1	2.7e-06	979.5	3	11	VVRAPVVPVDM(Oxidation)PSDGSAAAEPVGGNNSTAR	Oxidation@25	1	F20120607-18_ITMSms2cid	32.241	43.5	1.5e-09
canonical M18	15											1000.82	3	7	VVRAPVVPVDMPS(Phospho)DGSAAAEPVGGNNSTAR	Phospho@27|30	1	F20120607-18_ITMSms2cid	33.853	42.6	8.2e-10
canonical M18	18	1283.63	2	15	APVVPVDMPSDGSAAAEPVGGNNSTAR		0	F20120413-02_ITMSms2cid	31.726	56.6	1.1e-12	1283.63	2	13	APVVPVDMPSDGSAAAEPVGGNNSTAR		0	F20120607-18_ITMSms2cid	32.235	56.3	3.1e-11
canonical M18	57											1505.77	3	16	THTQQQQQQQQEQQQVPTVSVVTTATTATVFDSSAATGWIR		0	F20120607-18_ITMSms2cid	45.313	38.1	1.2e-08
canonical M18	265											654.83	2	-1.2	ETETPPERPPR		0	F20120607-18_ITMSms2cid	16.056	15.9	7.3e-05
canonical M18	300	743.72	3	-5.7	KKAASNNNLLNGGPVETTTGSR		2	F20120413-02_ITMSms2cid	22.141	25.7	1.4e-05	743.72	3	-5.7	KKAASNNNLLNGGPVETTTGSR		2	F20120607-18_ITMSms2cid	22.618	32.1	2.8e-06
canonical M18	301	701.03	3	5.8	KAASNNNLLNGGPVETTTGSR		1	F20120413-02_ITMSms2cid	24.558	36.4	9.8e-08	1051.04	2	4.5	KAASNNNLLNGGPVETTTGSR		1	F20120607-18_ITMSms2cid	25.166	39.1	2.5e-08
canonical M18	301	753.07	3	14	KAASNNNLLNGGPVETTTGSRR		2	F20120413-02_ITMSms2cid	22.248	19.7	0.00044
canonical M18	302	987	2	12	AASNNNLLNGGPVETTTGSR		0	F20120413-02_ITMSms2cid	27.549	28.4	5.8e-07	987	2	12	AASNNNLLNGGPVETTTGSR		0	F20120607-18_ITMSms2cid	27.964	34	4.9e-08
canonical M18	331	897.416	2	-0.95	Q(Gln->pyro-Glu)KAASAASSSSSASSSGPSR	Gln->pyro-Glu@331	1	F20120413-02_ITMSms2cid	13.894	41.1	3.7e-12	897.419	2	2.6	Q(Gln->pyro-Glu)KAASAASSSSSASSSGPSR	Gln->pyro-Glu@331	1	F20120607-18_ITMSms2cid	14.073	40.2	2.6e-11
canonical M18	433	1018.46	3	15	AGMSHSSVGGGGGEDGSC(Carbamidomethyl)DNLFLGSPISSDAK		0	F20120413-02_ITMSms2cid	33.364	32.9	1.1e-07	1018.46	3	15	AGMSHSSVGGGGGEDGSC(Carbamidomethyl)DNLFLGSPISSDAK		0	F20120413-03_ITMSms2cid	33.554	34.5	4.2e-08
canonical M18	433	1023.78	3	3.1	AGM(Oxidation)SHSSVGGGGGEDGSC(Carbamidomethyl)DNLFLGSPISSDAK	Oxidation@435	0	F20120413-02_ITMSms2cid	33.509	29.8	3.7e-07	1023.78	3	-0.35	AGM(Oxidation)SHSSVGGGGGEDGSC(Carbamidomethyl)DNLFLGSPISSDAK	Oxidation@435	0	F20120607-18_ITMSms2cid	33.505	35.9	6.2e-08
canonical M18	433											1045.1	3	-0.45	AGMSHSSVGGGGGEDGSC(Carbamidomethyl)DNLFLGS(Phospho)PISSDAK	Phospho@457=8	0	F20120607-18_ITMSms2cid	34.606	32.1	9.6e-07
canonical M18	433	1045.1	3	-0.64	AGMSHSSVGGGGGEDGSC(Carbamidomethyl)DNLFLGS(Phospho)PISSDAK	Phospho@457=16	0	F20120413-02_ITMSms2cid	34.115	26.3	2.7e-06
canonical M18	465											1382.68	3	6.7	TNVSFSSSPLLSLLLDSVIDSGTFDDSVVGESGTAGEDATR		0	F20120607-18_ITMSms2cid	55.154	36.6	7.5e-08
canonical M18	465											1492.07	3	13	TNVSFSSSPLLSLLLDSVIDSGTFDDSVVGESGTAGEDATRDGR		1	F20120607-18_ITMSms2cid	55.036	49	2.8e-11
canonical M18	506											1051.77	4	11	DGRGGGGGGNVGLGGDDNTNEAPPLLGGVAGEVVGVESEPSGSALR		1	F20120607-18_ITMSms2cid	43.263	38.2	1.2e-05
canonical M18	509	1292.65	3	18	GGGGGGNVGLGGDDNTNEAPPLLGGVAGEVVGVESEPSGSALR		0	F20120413-02_ITMSms2cid	43.622	28.3	1.7e-06	1292.65	3	18	GGGGGGNVGLGGDDNTNEAPPLLGGVAGEVVGVESEPSGSALR		0	F20120413-03_ITMSms2cid	43.663	29.9	8.8e-07
canonical M18	552	1237.08	2	9.2	VVGGDDAPSLVPSSGPFEESGGC(Carbamidomethyl)PR		0	F20120413-02_ITMSms2cid	35.123	26.7	2.6e-06	1237.07	2	0.46	VVGGDDAPSLVPSSGPFEESGGC(Carbamidomethyl)PR		0	F20120607-18_ITMSms2cid	35.595	34.7	2.3e-07
canonical M18	577											620.62	3	-0.56	SRSSTIASDSTTTDSESK		1	F20120607-18_ITMSms2cid	14.085	31.5	1.2e-06
canonical M18	577											597.293	4	0.54	SRSSTIASDSTTTDSESKWALR		2	F20120607-18_ITMSms2cid	25.451	31.4	3.2e-05
canonical M18	577	970.421	2	11	S(Phospho)RSSTIASDSTTTDSESK	Phospho@577|579|580|581	1	F20120413-02_ITMSms2cid	15.892	16.2	0.00069
canonical M18	579	808.86	2	-0.38	SSTIASDSTTTDSESK		0	F20120413-02_ITMSms2cid	15.26	33.3	1.4e-08	808.863	2	3.5	SSTIASDSTTTDSESK		0	F20120607-18_ITMSms2cid	15.368	29.8	6e-07
canonical M18	579	1072.02	2	13	SSTIASDSTTTDSESKWALR		1	F20120413-02_ITMSms2cid	27.356	31.3	7.8e-08	1072.02	2	8.3	SSTIASDSTTTDSESKWALR		1	F20120607-18_ITMSms2cid	27.826	43.2	1.1e-09
canonical M18	579											1111.99	2	-1.2	SSTIASDSTTTDS(Phospho)ESKWALR	Phospho@591=12	1	F20120607-18_ITMSms2cid	28.822	29.1	9.6e-07
canonical M18	579											1112	2	5.1	SSTIASDSTTT(Phospho)DSESKWALR	Phospho@589|591	1	F20120607-18_ITMSms2cid	28.854	25	1.9e-05
canonical M18	579	1111.99	2	-3.8	SSTIASDS(Phospho)TTTDSESKWALR	Phospho@586|587|588|589|590	1	F20120413-02_ITMSms2cid	28.431	23.2	2.1e-05
canonical M18	599	771.314	2	2.2	SC(Carbamidomethyl)GSFEGEPSNDQK		0	F20120413-02_ITMSms2cid	17.952	24.3	5.6e-06	771.31	2	-3	SC(Carbamidomethyl)GSFEGEPSNDQK		0	F20120607-18_ITMSms2cid	18.323	35.8	4.1e-08
canonical M18	599											566.578	3	0.27	SC(Carbamidomethyl)GSFEGEPSNDQKR		1	F20120413-03_ITMSms2cid	16.046	22.9	3.4e-06
canonical M18	599											560.756	4	0.77	SC(Carbamidomethyl)GSFEGEPSNDQKRSGIER		2	F20120607-18_ITMSms2cid	18.77	27	0.00016
canonical M18	624	539.95	3	0.68	VGFRPIGATPSDASSR		0	F20120413-02_ITMSms2cid	24.741	29.3	2.1e-06	809.423	2	3.3	VGFRPIGATPSDASSR		0	F20120413-03_ITMSms2cid	24.774	31.6	2.8e-08
canonical M18	624	583.55	4	4	VGFRPIGATPSDASSRETTPER		1	F20120413-02_ITMSms2cid	24.112	32.2	2.1e-05	1166.1	2	13	VGFRPIGATPSDASSRETTPER		1	F20120607-18_ITMSms2cid	24.761	19.6	0.0001
canonical M18	624	642.566	4	1.9	VGFRPIGATPSDASSRET(Phospho)TPERR	Phospho@637|638|641|642	2	F20120413-02_ITMSms2cid	22.988	34.5	1.5e-06	642.57	4	8.6	VGFRPIGATPSDASSRET(Phospho)TPERR	Phospho@637|638|641|642	2	F20120413-03_ITMSms2cid	23.032	37.8	6.3e-06
canonical M18	624											622.572	4	-1.8	VGFRPIGATPSDASSRETTPERR		2	F20120607-18_ITMSms2cid	22.853	40.7	1.9e-06
canonical M18	624											603.542	4	5.3	VGFRPIGATPSDASSRET(Phospho)TPER	Phospho@637|638|641|642	1	F20120413-03_ITMSms2cid	25.103	30.9	7e-05
canonical M18	624											556.88	5	4.4	VGFRPIGATPSDASSRET(Phospho)TPERRGR	Phospho@637|638|641|642	3	F20120607-18_ITMSms2cid	22.334	28.2	0.00054
canonical M18	624											642.57	4	8.6	VGFRPIGATPSDASSRETT(Phospho)PERR	Phospho@638|641|642	2	F20120607-18_ITMSms2cid	23.683	33.3	1.3e-05
canonical M18	624											695.844	4	-1.9	VGFRPIGATPSDASSRETT(Phospho)PERRGR	Phospho@641|642	3	F20120607-18_ITMSms2cid	22.34	34	6.3e-05
canonical M18	624	603.539	4	-0.55	VGFRPIGATPSDASSRETT(Phospho)PER	Phospho@637|638|641|642	1	F20120413-02_ITMSms2cid	25.065	29.8	0.00014
canonical M18	650											882.923	2	-5.3	SRLVDSREPSSSDSSR		2	F20120607-18_ITMSms2cid	14.638	24.6	7.4e-06
canonical M18	652	756.85	4	4.2	LVDSREPSSS(Phospho)DSSRERPADDTANIPSR	Phospho@659|660|662	2	F20120413-02_ITMSms2cid	20.487	26.7	0.00013	756.84	4	-9	LVDSREPSSS(Phospho)DSSRERPADDTANIPSR	Phospho@659|660|661|663	2	F20120607-18_ITMSms2cid	21.013	27.7	0.00022
canonical M18	652	761.361	2	0.51	LVDSREPSSSDSSR		1	F20120413-02_ITMSms2cid	13.774	20.2	3.2e-05	507.91	3	0.98	LVDSREPSSSDSSR		1	F20120413-03_ITMSms2cid	13.673	29.1	9.5e-07
canonical M18	652											756.848	4	1	LVDSREPSSSDS(Phospho)SRERPADDTANIPSR	Phospho@661|663|664	2	F20120413-03_ITMSms2cid	20.47	22.4	0.00052
canonical M18	652											982.14	3	2.2	LVDSREPSSSDSSRERPADDTANIPSR		2	F20120607-18_ITMSms2cid	20.049	17.2	0.00039
canonical M18	666	700.335	4	2.6	ERPADDTANIPSRGGPGGSSATEMPATR		1	F20120413-02_ITMSms2cid	22.484	33.5	2.2e-05	933.44	3	-2.4	ERPADDTANIPSRGGPGGSSATEMPATR		1	F20120413-03_ITMSms2cid	22.505	26.5	2.9e-06
canonical M18	666	704.335	4	4.5	ERPADDTANIPSRGGPGGSSATEM(Oxidation)PATR	Oxidation@689	1	F20120413-02_ITMSms2cid	22.701	24.4	0.00031	704.327	4	-7	ERPADDTANIPSRGGPGGSSATEM(Oxidation)PATR	Oxidation@689	1	F20120413-03_ITMSms2cid	22.554	29.6	3.2e-05
canonical M18	666	721.356	2	1.5	ERPADDTANIPSR		0	F20120413-02_ITMSms2cid	17.993	28.3	2.8e-06	721.354	2	-2.3	ERPADDTANIPSR		0	F20120413-03_ITMSms2cid	17.975	26.7	2.4e-06
canonical M18	679	688.317	2	-0.68	GGPGGSSATEMPATR		0	F20120413-02_ITMSms2cid	18.976	36.1	1e-08	688.317	2	-0.53	GGPGGSSATEMPATR		0	F20120413-03_ITMSms2cid	18.955	34.8	5.3e-09
canonical M18	679	696.314	2	-0.89	GGPGGSSATEM(Oxidation)PATR	Oxidation@689	0	F20120413-02_ITMSms2cid	19.065	32.5	6.5e-08	696.316	2	1.3	GGPGGSSATEM(Oxidation)PATR	Oxidation@689	0	F20120413-03_ITMSms2cid	19.077	33.2	1e-08
canonical M18	704	678.08	4	2.2	SDSTSRSPTNQTSTTTTPSSSPTPKR		2	F20120413-02_ITMSms2cid	15.402	27.5	4.9e-05	903.776	3	7.4	SDSTSRSPTNQTSTTTTPSSSPTPKR		2	F20120607-18_ITMSms2cid	15.672	27.3	1.5e-06
canonical M18	704	851.74	3	5.6	SDSTSRSPTNQTSTTTTPSSSPTPK		1	F20120413-02_ITMSms2cid	16.591	19.9	6e-05	1277.12	2	15	SDSTSRSPTNQTSTTTTPSSSPTPK		1	F20120607-18_ITMSms2cid	16.929	31.6	1.3e-06
canonical M18	704											905.048	3	2.7	S(Phospho)DSTSRSPTNQTSTTTTPSS(Phospho)SPTPK		1	F20120413-03_ITMSms2cid	17.503	16	0.00075
canonical M18	704											718.06	4	-2.3	SDSTSRSPT(Phospho)NQTSTTTTPSS(Phospho)SPTPKR		2	F20120413-03_ITMSms2cid	16.214	29.5	5.2e-06
canonical M18	704											878.391	3	0.62	SDSTSRSPTNQTSTTTTPSSS(Phospho)PTPK	Phospho@720|722|723|724|726	1	F20120413-03_ITMSms2cid	17.129	18	0.00077
canonical M18	704											905.051	3	4.9	S(Phospho)DSTSRSPTNQTSTTTTPS(Phospho)SSPTPK		1	F20120607-18_ITMSms2cid	17.479	21.1	0.00011
canonical M18	704											957.08	3	0.21	SDSTSRS(Phospho)PTNQTSTTTTPSSSPT(Phospho)PKR		2	F20120607-18_ITMSms2cid	16.326	21.4	5.2e-05
canonical M18	704											1317.08	2	-3.2	SDSTSRS(Phospho)PTNQTSTTTTPSSSPTPK	Phospho@710|712	1	F20120607-18_ITMSms2cid	17.568	22.3	6.3e-06
canonical M18	704											718.066	4	6.3	SDSTSRSPT(Phospho)NQTSTTTTPSSSPT(Phospho)PKR		2	F20120607-18_ITMSms2cid	16.48	32.4	1e-05
canonical M18	704											957.082	3	2.8	SDSTSRSPTNQT(Phospho)STTTTPSS(Phospho)SPTPKR		2	F20120607-18_ITMSms2cid	16.32	20.8	4.6e-05
canonical M18	704											930.42	3	-4.7	SDSTSRSPTNQTSTTTTPS(Phospho)SSPTPKR	Phospho@722|723|724|726	2	F20120607-18_ITMSms2cid	16.044	20.4	0.00052
canonical M18	704	698.069	4	-1.1	SDSTSRSPTNQTS(Phospho)TTTTPSSSPTPKR	Phospho@715|716|719|720|722|723	2	F20120413-02_ITMSms2cid	15.82	25.5	0.00024
canonical M18	704	905.04	3	-6.7	SDSTSRSPTNQT(Phospho)STTTTPS(Phospho)SSPTPK		1	F20120413-02_ITMSms2cid	17.605	15.7	0.00044
canonical M18	704	957.08	3	0.21	SDS(Phospho)TSRSPTNQTSTTTT(Phospho)PSSSPTPKR		2	F20120413-02_ITMSms2cid	16.129	25.2	4.2e-07
canonical M18	710	719.33	3	-5.2	SPTNQTSTTTTPS(Phospho)SSPTPKR	Phospho@722|723|724	1	F20120413-02_ITMSms2cid	15.766	22.9	2.1e-05	719.331	3	-3.3	SPTNQTSTTTTPS(Phospho)SSPTPKR	Phospho@722|723|724	1	F20120607-18_ITMSms2cid	16.05	20.6	0.00031
canonical M18	710	960.462	2	-1.4	SPTNQTSTTTTPSSSPTPK		0	F20120413-02_ITMSms2cid	16.743	31.2	2.5e-08	960.464	2	0.97	SPTNQTSTTTTPSSSPTPK		0	F20120607-18_ITMSms2cid	17.019	34.6	4.6e-08
canonical M18	710	1000.45	2	3.3	SPTNQTSTTTTPSSS(Phospho)PTPK	Phospho@724=7	0	F20120413-02_ITMSms2cid	17.381	28.9	1.3e-07	1000.45	2	2.3	SPTNQTSTTTTPSSS(Phospho)PTPK	Phospho@722|724	0	F20120413-03_ITMSms2cid	17.394	24.6	9e-07
canonical M18	710	1038.51	2	-1.7	SPTNQTSTTTTPSSSPTPKR		1	F20120413-02_ITMSms2cid	15.305	24.4	2.9e-07	1038.52	2	3.5	SPTNQTSTTTTPSSSPTPKR		1	F20120607-18_ITMSms2cid	15.613	32.4	5.8e-08
canonical M18	710	1078.5	2	5.2	SPTNQTSTTTTPSSS(Phospho)PTPKR	Phospho@724=8	1	F20120413-02_ITMSms2cid	15.826	24.3	3.9e-07	1078.5	2	2.4	SPTNQTSTTTTPSSS(Phospho)PTPKR	Phospho@724=9	1	F20120413-03_ITMSms2cid	15.79	18.9	3.4e-06
canonical M18	710											1078.5	2	2.8	SPTNQTSTT(Phospho)TTPSSSPTPKR	Phospho@718=7	1	F20120607-18_ITMSms2cid	16.114	18.8	5.7e-05
canonical M18	710	1000.45	2	3.6	SPTNQTSTTTTPSSSPT(Phospho)PK	Phospho@724|726	0	F20120413-02_ITMSms2cid	17.387	20.3	1.8e-05
canonical M18	734	652.357	3	10	RTTVTATC(Carbamidomethyl)DPIVPAPISR		1	F20120413-02_ITMSms2cid	28.792	27.6	3.3e-07	652.357	3	10	RTTVTATC(Carbamidomethyl)DPIVPAPISR		1	F20120413-03_ITMSms2cid	28.785	22.8	4.6e-05
canonical M18	734											528.541	4	2.3	RTTVTATC(Carbamidomethyl)DPIVPAPISRR		2	F20120607-18_ITMSms2cid	26.955	34.5	1.6e-05
canonical M18	735	899.98	2	8.9	TTVTATC(Carbamidomethyl)DPIVPAPISR		0	F20120413-02_ITMSms2cid	32.066	39	1e-08	899.982	2	11	TTVTATC(Carbamidomethyl)DPIVPAPISR		0	F20120607-18_ITMSms2cid	32.505	39	2.5e-09
canonical M18	752	780.71	3	-2.1	RRQS(Phospho)LDGRPSAATFPESSAAR	Phospho@755=15	2	F20120413-02_ITMSms2cid	21.617	18.8	0.00016	585.79	4	7.6	RRQS(Phospho)LDGRPSAATFPESSAAR	Phospho@755=21	2	F20120413-03_ITMSms2cid	21.626	32	9.5e-06
canonical M18	752											1130.59	2	7.3	RRQSLDGRPSAATFPESSAAR		2	F20120607-18_ITMSms2cid	21.09	16.6	0.00028
canonical M18	753	702.02	3	-3.6	RQSLDGRPSAATFPESSAAR		1	F20120413-02_ITMSms2cid	22.193	22.2	3.6e-05	702.03	3	11	RQSLDGRPSAATFPESSAAR		1	F20120607-18_ITMSms2cid	22.79	31.2	2.8e-07
canonical M18	753	728.68	3	2.8	RQS(Phospho)LDGRPSAATFPESSAAR	Phospho@755=25	1	F20120413-02_ITMSms2cid	23.769	22.5	0.00012	728.68	3	2.2	RQS(Phospho)LDGRPSAATFPESSAAR	Phospho@755=29	1	F20120607-18_ITMSms2cid	24.312	27.3	1.4e-05
canonical M18	754	965.97	2	3.8	Q(Gln->pyro-Glu)SLDGRPSAATFPESSAAR	Gln->pyro-Glu@754	0	F20120413-02_ITMSms2cid	28.892	27.1	3.9e-07	965.977	2	11	Q(Gln->pyro-Glu)SLDGRPSAATFPESSAAR	Gln->pyro-Glu@754	0	F20120607-18_ITMSms2cid	29.318	26.9	4.5e-06
canonical M18	754											649.99	3	1.8	QSLDGRPSAATFPESSAAR		0	F20120413-03_ITMSms2cid	25.936	21.1	2.6e-05
canonical M18	773	526.962	3	1.2	LGGNPRPVENGVITR		0	F20120413-02_ITMSms2cid	22.063	34.9	2.6e-08	526.961	3	-2	LGGNPRPVENGVITR		0	F20120413-03_ITMSms2cid	22.049	29	4.7e-07
canonical M18	793	440.731	4	1.5	DGHPLSKPLHT(Phospho)PPRK	Phospho@803=24	1	F20120413-02_ITMSms2cid	15.703	25.9	4.3e-05	440.731	4	0.59	DGHPLSKPLHT(Phospho)PPRK	Phospho@803=25	1	F20120413-03_ITMSms2cid	15.731	26.1	8.6e-05
canonical M18	793	544.606	3	-1.4	DGHPLSKPLHT(Phospho)PPR	Phospho@803=18	0	F20120413-02_ITMSms2cid	18.412	19.8	0.00015	816.406	2	-0.27	DGHPLSKPLHT(Phospho)PPR	Phospho@803=15	0	F20120607-18_ITMSms2cid	18.818	27.5	4.8e-07
canonical M18	793	776.42	2	-4.1	DGHPLSKPLHTPPR		0	F20120413-02_ITMSms2cid	16.549	32	2.8e-08	776.426	2	3.3	DGHPLSKPLHTPPR		0	F20120607-18_ITMSms2cid	17.025	37.1	3.3e-09
canonical M18	809	729.57	4	9.7	KPPRS(Phospho)PEAQQQSDDDGHGDGATDDRR	Phospho@813=14	2	F20120413-02_ITMSms2cid	12.43	26.7	2.9e-05
canonical M18	813											686.696	5	3.3	SPEAQQQSDDDGHGDGATDDRRSSSDSGADLPR		2	F20120607-18_ITMSms2cid	17.772	26.4	0.00033
canonical M18	835	546.253	2	1.3	SSSDSGADLPR		0	F20120413-02_ITMSms2cid	17.472	40.3	8.5e-07	546.253	2	2.4	SSSDSGADLPR		0	F20120607-18_ITMSms2cid	17.67	39.9	4.2e-07
canonical M18	853	488.751	2	-0.45	ISVDEGTQK		0	F20120413-02_ITMSms2cid	16.638	22.3	1.4e-05	488.751	2	-0.044	ISVDEGTQK		0	F20120413-03_ITMSms2cid	16.607	28.9	1e-05
canonical M18	875	638.614	3	-2.2	AKS(Phospho)PAAM(Oxidation)TAEDEPKDTR	Phospho@877=18;Oxidation@881	2	F20120413-02_ITMSms2cid	17.7	19.2	0.00027	957.42	2	1.1	AKS(Phospho)PAAM(Oxidation)TAEDEPKDTR	Phospho@877=7;Oxidation@881	2	F20120413-03_ITMSms2cid	17.669	21.5	2.1e-05
canonical M18	875	644.57	4	0.48	AKSPAAM(Oxidation)TAEDEPKDTRGPGFVQR	Oxidation@881	3	F20120413-02_ITMSms2cid	22.154	24.4	0.00067	859.09	3	-0.57	AKSPAAM(Oxidation)TAEDEPKDTRGPGFVQR	Oxidation@881	3	F20120607-18_ITMSms2cid	22.625	27.1	2e-05
canonical M18	875	660.57	4	11	AKS(Phospho)PAAMTAEDEPKDTRGPGFVQR	Phospho@877=24	3	F20120413-02_ITMSms2cid	22.976	29.8	1.1e-05	880.42	3	6.5	AKS(Phospho)PAAMTAEDEPKDTRGPGFVQR	Phospho@877=9	3	F20120413-03_ITMSms2cid	22.954	27.9	7.5e-07
canonical M18	875	853.76	3	1.3	AKSPAAMTAEDEPKDTRGPGFVQR		3	F20120413-02_ITMSms2cid	22.051	26.1	2.4e-06	853.765	3	6.9	AKSPAAMTAEDEPKDTRGPGFVQR		3	F20120607-18_ITMSms2cid	22.515	37.2	3e-07
canonical M18	875	909.439	2	0.29	AKSPAAMTAEDEPKDTR		2	F20120413-02_ITMSms2cid	16.809	41.7	9.4e-10	909.44	2	1.6	AKSPAAMTAEDEPKDTR		2	F20120413-03_ITMSms2cid	16.821	34.3	2.3e-08
canonical M18	875	949.43	2	8.7	AKS(Phospho)PAAMTAEDEPKDTR	Phospho@877=19	2	F20120413-02_ITMSms2cid	17.635	25	1.5e-06	949.42	2	-1.8	AKS(Phospho)PAAMTAEDEPKDTR	Phospho@877=11	2	F20120413-03_ITMSms2cid	17.579	26.7	1.1e-06
canonical M18	875											885.744	3	-2.2	AKS(Phospho)PAAM(Oxidation)TAEDEPKDTRGPGFVQR	Phospho@877=14;Oxidation@881	3	F20120607-18_ITMSms2cid	21.222	24.4	4.1e-05
canonical M18	875											763.334	2	0.47	AKS(Phospho)PAAMTAEDEPK	Phospho@877=31	1	F20120607-18_ITMSms2cid	19.099	27.1	4.6e-07
canonical M18	877	787.38	3	-1.9	SPAAMTAEDEPKDTRGPGFVQR		2	F20120413-02_ITMSms2cid	23.411	29.6	4.9e-07	787.38	3	-1.9	SPAAMTAEDEPKDTRGPGFVQR		2	F20120413-03_ITMSms2cid	23.429	30.9	8.1e-07
canonical M18	877	809.872	2	-0.74	SPAAMTAEDEPKDTR		1	F20120413-02_ITMSms2cid	17.8	32.8	1.9e-07	809.874	2	1.9	SPAAMTAEDEPKDTR		1	F20120607-18_ITMSms2cid	18.223	37.4	3.3e-08
canonical M18	892	380.709	2	1.7	GPGFVQR		0	F20120413-02_ITMSms2cid	18.304	22.6	4.7e-05	380.709	2	0.89	GPGFVQR		0	F20120413-03_ITMSms2cid	18.294	22.9	4.6e-05
canonical M18	910	1135.97	3	7.1	EAAKRPLLPPSPLRPSTPQQQLVNPNNSLSR		1	F20120413-02_ITMSms2cid	30.598	16.9	6e-05	852.23	4	7.9	EAAKRPLLPPSPLRPSTPQQQLVNPNNSLSR		1	F20120607-18_ITMSms2cid	31.384	39.2	1.4e-05
canonical M18	910											872.22	4	5.9	EAAKRPLLPPS(Phospho)PLRPSTPQQQLVNPNNSLSR	Phospho@920|925|926	1	F20120413-03_ITMSms2cid	32.084	30.2	0.00016
canonical M18	910											872.22	4	6.2	EAAKRPLLPPSPLRPS(Phospho)TPQQQLVNPNNSLSR	Phospho@920|925|926	1	F20120607-18_ITMSms2cid	33.213	31.1	0.00053
canonical M18	914	1002.9	3	11	RPLLPPSPLRPSTPQQQLVNPNNSLSR		0	F20120413-02_ITMSms2cid	32.199	29.2	1.5e-07	1002.9	3	8.6	RPLLPPSPLRPSTPQQQLVNPNNSLSR		0	F20120607-18_ITMSms2cid	33.088	34.5	5.5e-08
canonical M18	914											1029.55	3	3.1	RPLLPPS(Phospho)PLRPSTPQQQLVNPNNSLSR	Phospho@920=20	0	F20120413-03_ITMSms2cid	34.387	21.3	6.9e-05
canonical M18	989	1120.52	2	8.6	GPGDEDDPLGDAVVPDGMTGVAR		0	F20120413-02_ITMSms2cid	37.576	40.4	1e-08	1120.52	2	8.6	GPGDEDDPLGDAVVPDGMTGVAR		0	F20120607-18_ITMSms2cid	38.065	36.8	6.6e-09
Strep Tag	N/A	916.9	2	-1.1	GGGSGGGSGGGSWSHPQFEK		0	F20120413-02_ITMSms2cid	22.837	35.3	7.1e-08	916.905	2	4.5	GGGSGGGSGGGSWSHPQFEK		0	F20120413-03_ITMSms2cid	22.984	36.4	1.8e-09
N-term Strep Tag	N/A	616.286	2	7.4	Acetyl-MWSHPQFEK		0	F20120413-02_ITMSms2cid	32.487	33.9	1.1e-07
N-term Strep Tag	N/A	624.281	2	2.4	Acetyl-M(Oxidation)WSHPQFEK		0	F20120413-02_ITMSms2cid	29.087	33.2	3.8e-07
