# Supplementary figures and images for: A Herpesviral induction of RAE-1 NKG2D ligand expression occurs through release of HDAC mediated repression
Source: eLife journal article supplement (doi:10.7554/elife.14749), 2016-11-22

**A**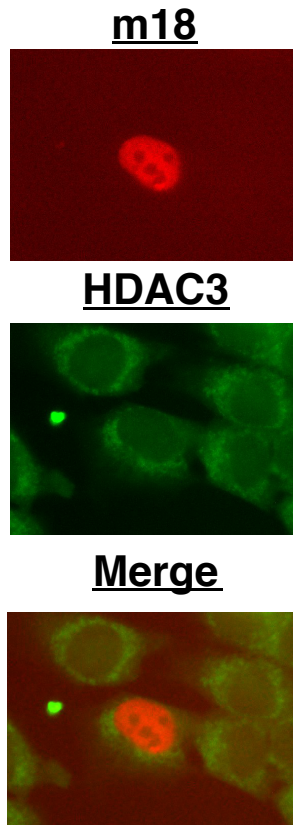**B**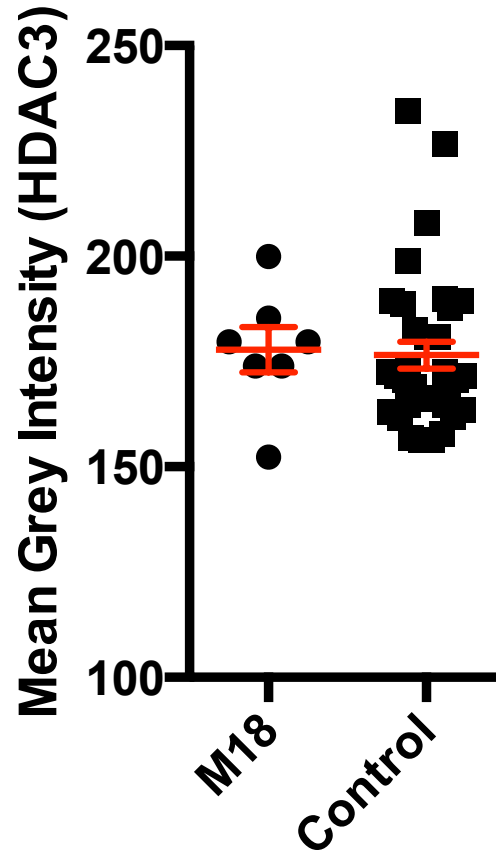

Figure 6-Figure Supplement 1: m18 expression does not change HDAC3 levels

Supplement: supp [file elife-14749-supp-v1.zip]

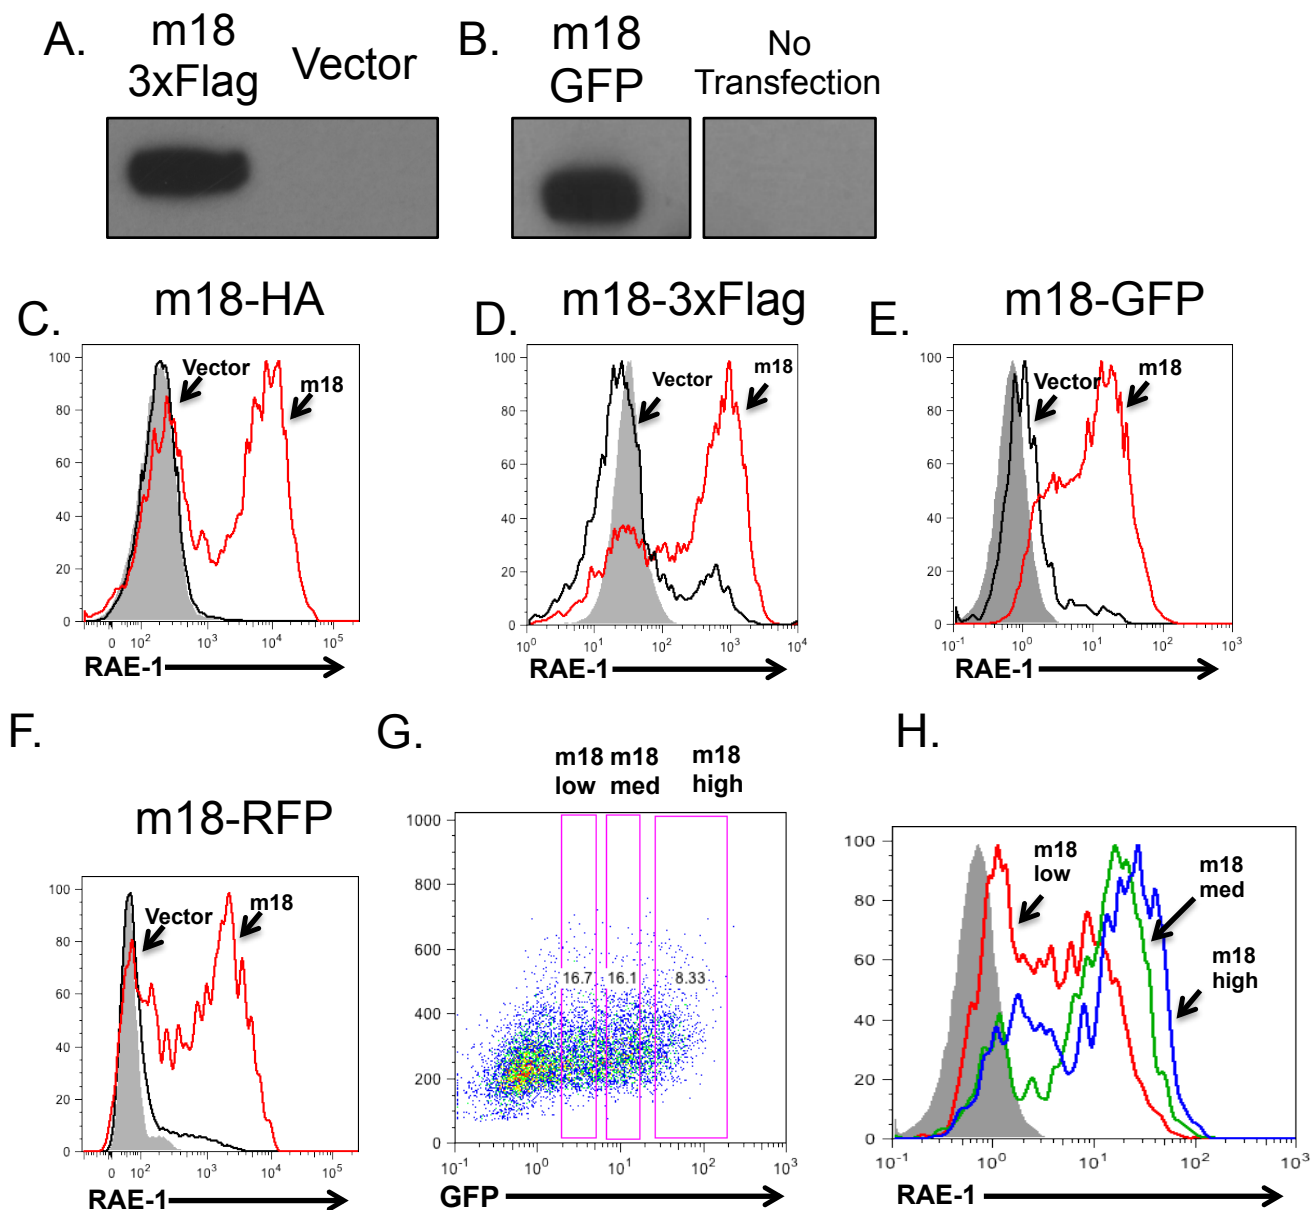

**Figure 2-Figure Supplement 1: m18 fusion constructs express protein and induce RAE-1 expression.**

Supplement: supp [file elife-14749-supp-v1.zip › elife_poa_e14749_Figure_2_figure_supplement_1.pdf]

**A**

## MCA-205

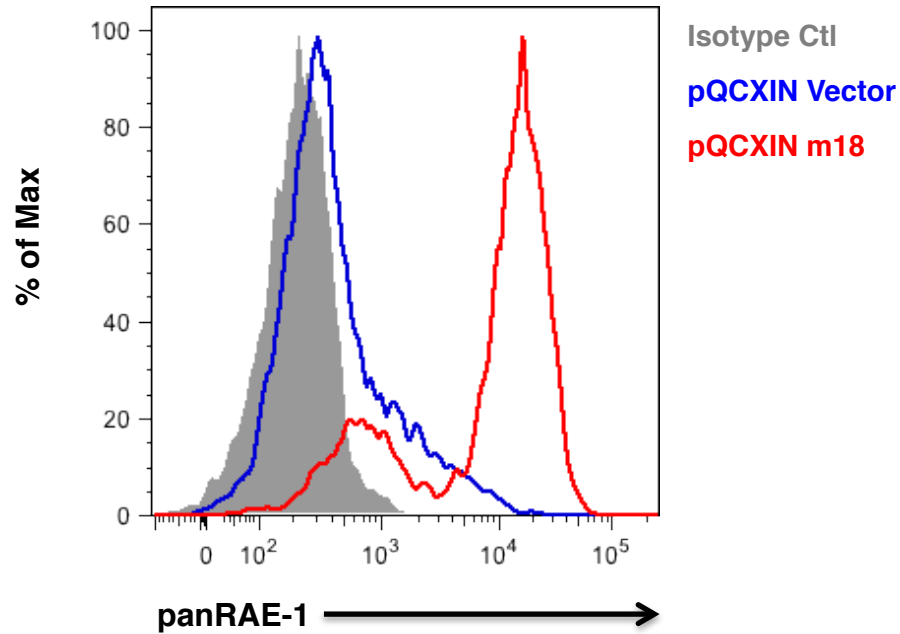

**Figure 3-Figure Supplement 2: MCA-205 carcinoma cell line is inducible for RAE-1 expression by m18.**

Supplement: supp [file elife-14749-supp-v1.zip › elife_poa_e14749_Figure_3_figure_supplement_2.pdf]

**A**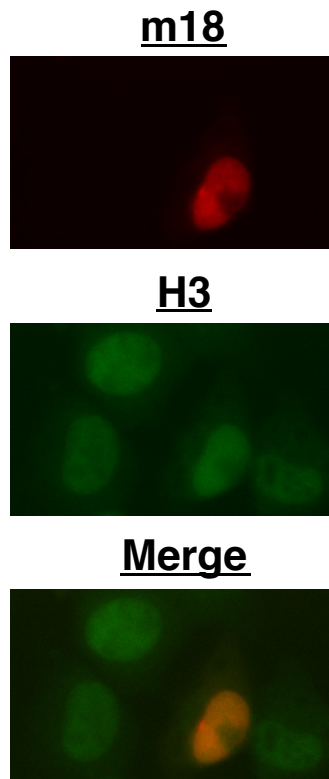**B**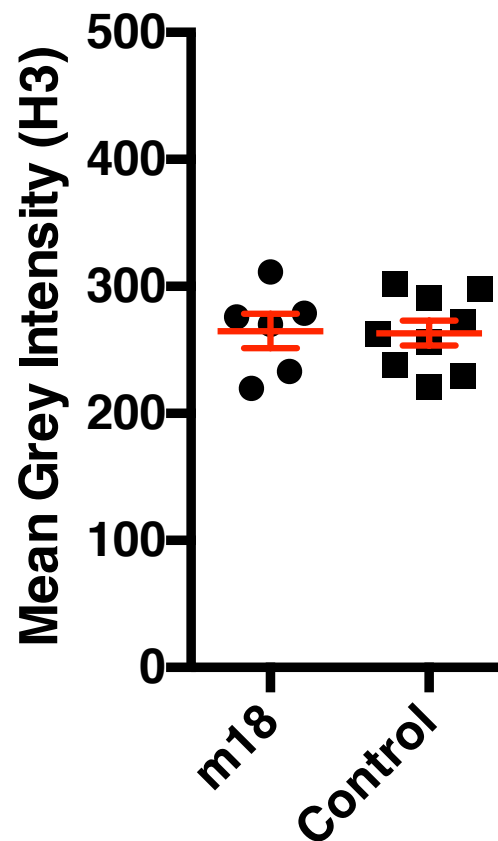

Figure 5-Figure Supplement 1: m18 expression does not change Histone 3 levels

Supplement: supp [file elife-14749-supp-v1.zip › elife_poa_e14749_Figure_5_figure_supplement1.pdf]
